# Supplementary material for: miR-34b associates with epithelial-mesenchymal transition and regulates BMP7, CAV1, ID2 and FN1 in human cervical cancer
Source: bioRxiv or medRxiv preprint supplement (doi:10.1101/2021.09.02.458804), 2022-10-25

Figure S1

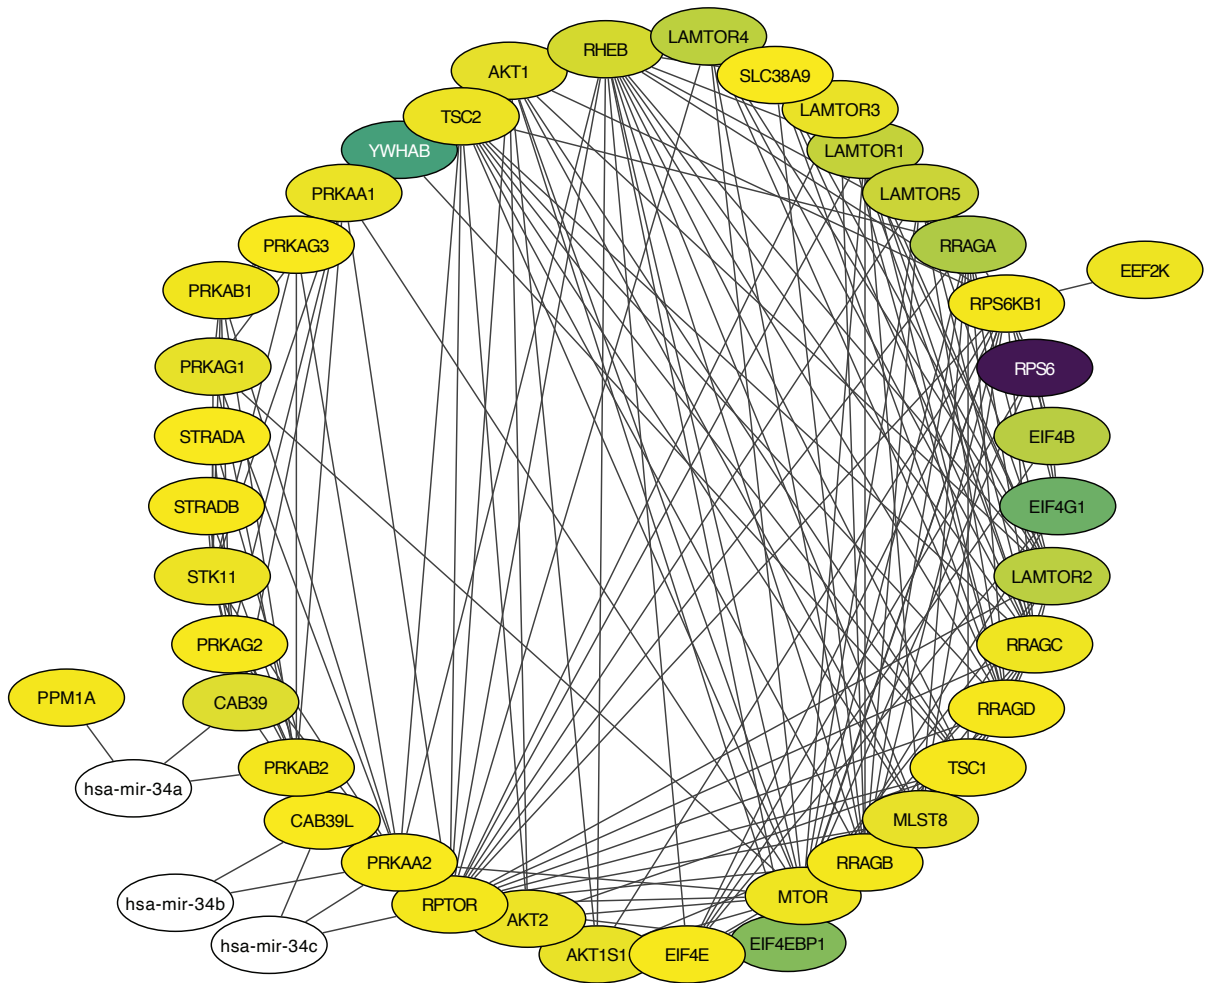

Supplement: Supplementary file [file media-1.pdf]
